# Supplementary material
Source: publisher site journal article supplement (https://www.dovepress.com/get_supplementary_file.php?f=325498.docx)
Supplement: Supplementary file 1 [file get_supplementary_file.php]

**Supplementary material**

Chika Sakai et al

**Change in antidepressant use after initiation of ADHD medication in Japanese adults with comorbid depression: a real-world database analysis**

Chika Sakai1 Toshinaga Tsuji1 Toru Nakai1 Yuki Namba1 Hirokazu Mishima1 Masakazu Fujiwara2 Hisato Matsunaga3

1Medical Affairs Department, Shionogi & Co. Ltd, Osaka, Japan 2Data Science Office, Shionogi & Co. Ltd, Osaka, Japan 3Department of Neuropsychiatry, Hyogo College of Medicine, Hyogo, Japan

**Supplementary Table 1** Mean prescribed dosage of anxiolytics

|  | By total patients | | | | | | By patients receiving anxiolytics | | | | | |
| --- | --- | --- | --- | --- | --- | --- | --- | --- | --- | --- | --- | --- |
|  | ADHD group | | | Control group | | | ADHD group | | | Control group | | |
|  | N | Mean  (mg) | SD | N | Mean  (mg) | SD | N | Mean  (mg) | SD | N | Mean  (mg) | SD |
| Baseline | 85 | 206.3 | 281.2 | 90 | 284.9 | 263.0 | 85 | 206.3 | 281.2 | 90 | 284.9 | 263.0 |
| Period  after the index date |  |  |  |  |  |  |  |  |  |  |  |  |
| 1 month | 85 | 234.0 | 316.1 | 90 | 263.0 | 293.2 | 78 | 255.0 | 321.9 | 80 | 295.9 | 295.0 |
| 2 months | 85 | 217.9 | 317.6 | 90 | 258.0 | 296.7 | 75 | 246.9 | 327.4 | 80 | 290.3 | 299.5 |
| 3 months | 85 | 214.2 | 312.2 | 90 | 240.4 | 294.5 | 73 | 249.4 | 323.7 | 70 | 309.1 | 300.5 |
| 4 months | 85 | 203.3 | 304.8 | 90 | 239.9 | 287.4 | 68 | 254.1 | 321.6 | 71 | 304.1 | 291.9 |
| 5 months | 85 | 182.8 | 251.0 | 90 | 231.9 | 291.2 | 64 | 242.7 | 263.1 | 67 | 311.6 | 298.6 |
| 6 months | 85 | 167.5 | 196.8 | 90 | 224.2 | 289.0 | 64 | 222.5 | 198.1 | 65 | 310.4 | 298.3 |

**Notes:** Baseline is the 1-month period before the index date.

**Abbreviations:** ADHD, attention-deficit/hyperactivity disorder; SD, standard deviation.

**Supplementary Table 2** Mean prescribed dosage of hypnotics

|  | By total patients | | | | | | By patients receiving hypnotics | | | | | |
| --- | --- | --- | --- | --- | --- | --- | --- | --- | --- | --- | --- | --- |
|  | ADHD group | | | Control group | | | ADHD group | | | Control group | | |
|  | N | Mean  (mg) | SD | N | Mean  (mg) | SD | N | Mean  (mg) | SD | N | Mean  (mg) | SD |
| Baseline | 105 | 181.5 | 136.9 | 116 | 254.6 | 234.2 | 105 | 181.5 | 136.9 | 116 | 254.6 | 234.2 |
| Period  after the index date |  |  |  |  |  |  |  |  |  |  |  |  |
| 1 month | 105 | 197.9 | 150.2 | 116 | 233.6 | 239.7 | 104 | 199.8 | 149.7 | 112 | 241.9 | 239.8 |
| 2 months | 105 | 172.7 | 163.6 | 116 | 236.6 | 249.9 | 93 | 195.0 | 160.8 | 106 | 258.3 | 250.1 |
| 3 months | 105 | 162.9 | 148.2 | 116 | 231.1 | 250.2 | 93 | 183.9 | 144.6 | 103 | 260.2 | 250.8 |
| 4 months | 105 | 169.5 | 156.6 | 116 | 227.5 | 263.3 | 89 | 200.0 | 151.0 | 103 | 256.2 | 266.0 |
| 5 months | 105 | 174.6 | 166.1 | 116 | 226.8 | 238.3 | 85 | 215.6 | 158.7 | 100 | 263.1 | 237.4 |
| 6 months | 105 | 174.1 | 158.7 | 116 | 215.7 | 255.8 | 84 | 217.7 | 148.2 | 93 | 269.1 | 259.3 |

**Notes:** Baseline is the 1-month period before the index date.

**Abbreviations:** ADHD, attention-deficit/hyperactivity disorder; SD, standard deviation.
